# Supplementary material for: Studies on the Drug Loading and Release Profiles of Degradable Chitosan-Based Multilayer Films for Anticancer Treatment
Source: PubMed Central journal article supplement (PMC7140006; doi:10.3390/cancers12030593), 2020-03-05
Supplement: cancers-12-00593-s001.pdf [file cancers-12-00593-s001.pdf]

# Studies on the Drug Loading and Release Profiles of Degradable Chitosan-Based Multilayer Films for Anticancer Treatment

Hyeongdeok Sun, Daheui Choi, Jiwoong Heo, Se Yong Jung and Jinkee Hong

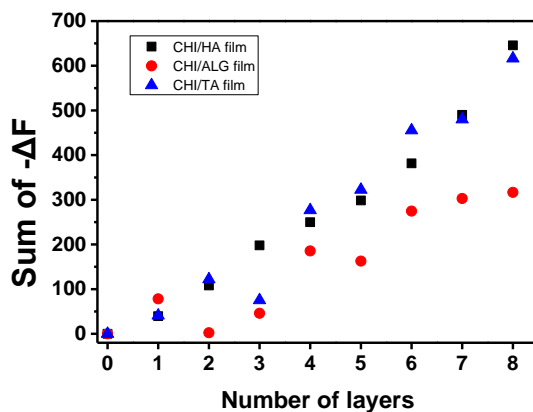

Figure S1. Stepwise frequency decrement of CHI/HA, CHI/ALG, and CHI/TA films as a number of layers measured by QCM.

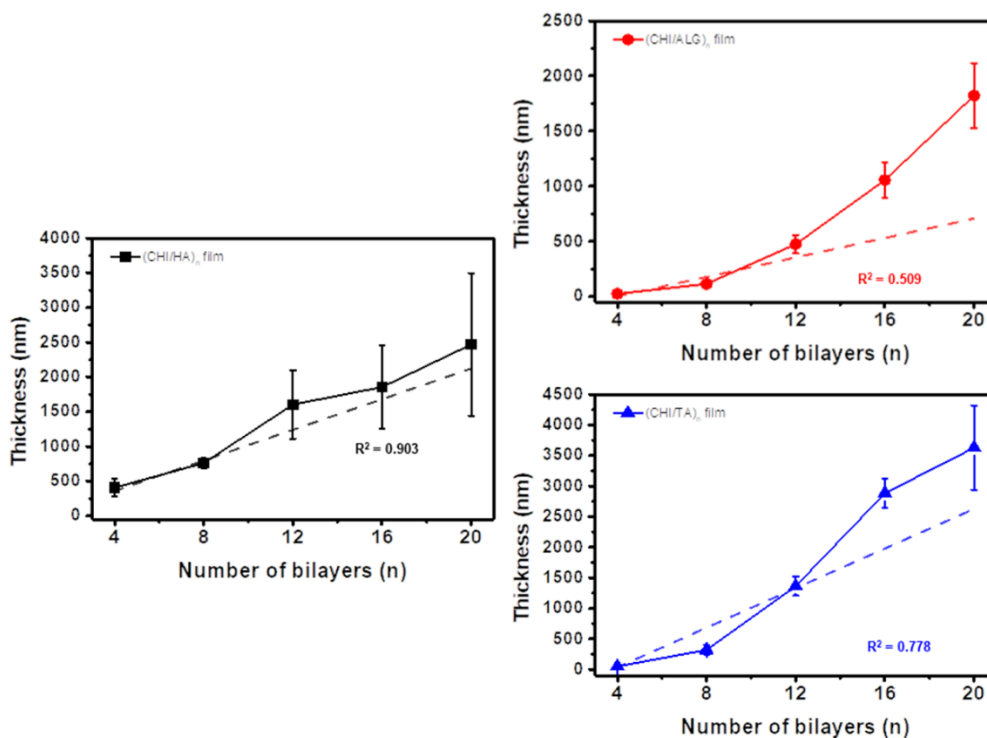

Figure S2. Multilayer films thickness growth with regression line as number of bilayers increased.

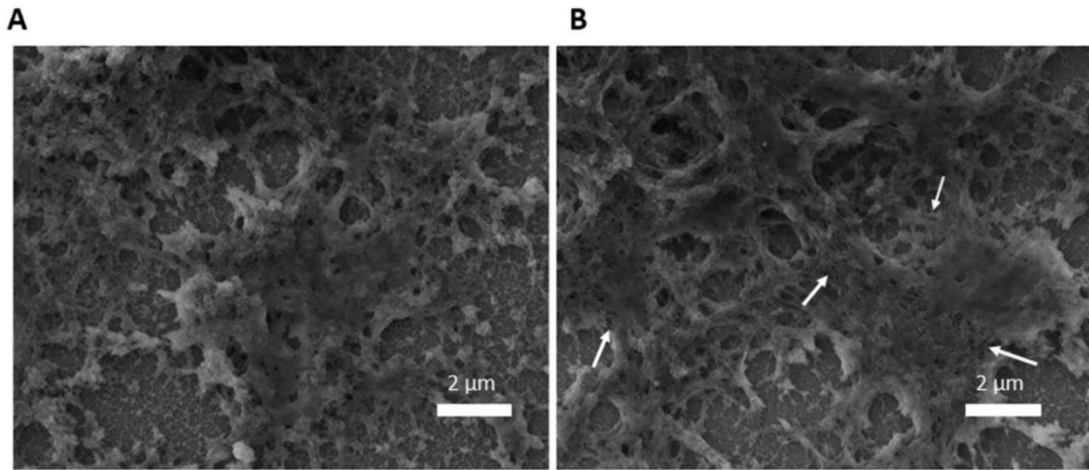

**Figure S3.** SEM images of CHI/TA film. (A) Bare CHI/TA film and (B) dipping in PBS buffer at 37 °C for 48 h. The white arrows indicate the dis-linked and disassembled CHI+TA aggregates in film.

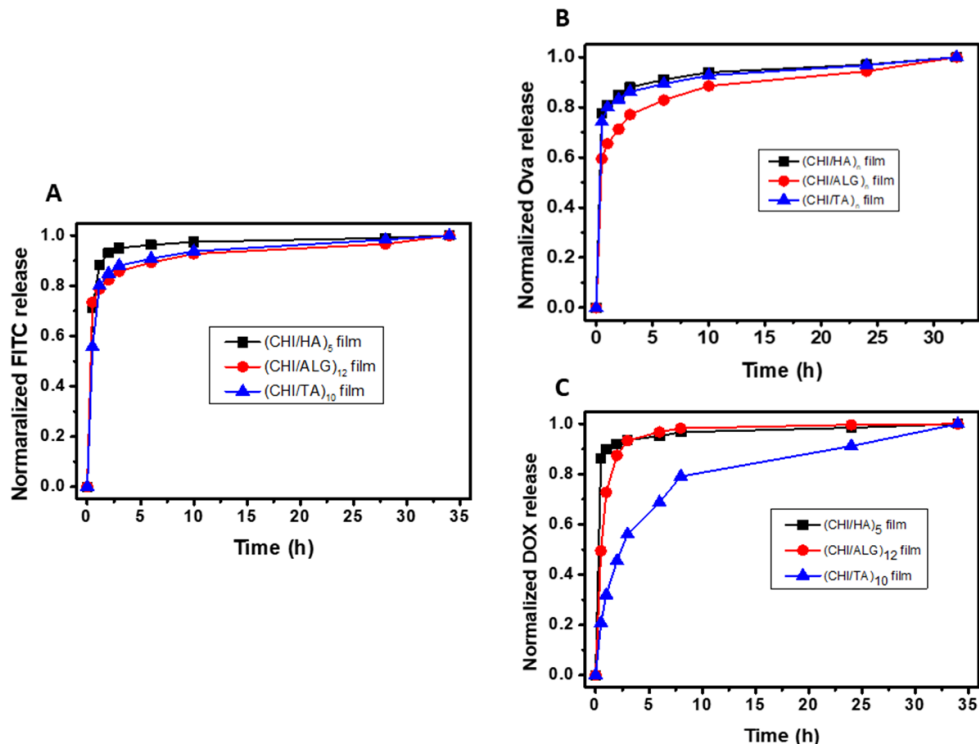

**Figure S4.** All release profiles of (A) FITC, (B) Ova, and (C) DOX, respectively.

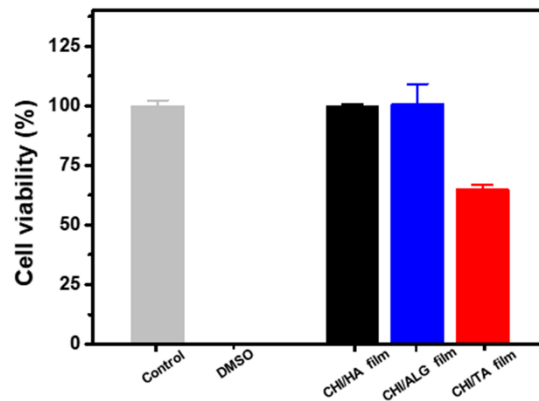

**Figure S5.** The cell viability of human dermal fibroblast cell.

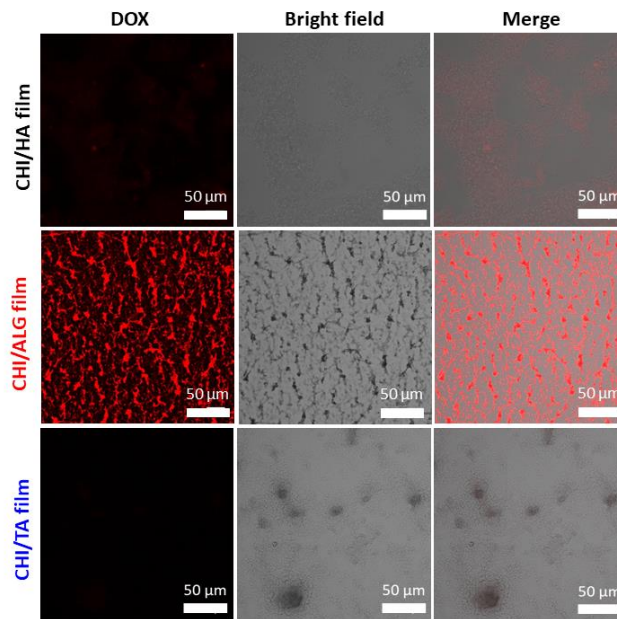

**Figure S6.** Confocal microscope image of DOX-incorporated multilayer films. Red fluorescence and bright field represent DOX and film structure.

**Table S1.** Table for degradation rate of multilayer films under 1× PBS at 37°C measured by changes in thickness.

| Average Thickness (nm) | 0 h                        | 0.5 h                     | 1 h                      | 3 h                       | 7 h                      | 14 h                     | 24 h                     | 48 h                     |
|------------------------|----------------------------|---------------------------|--------------------------|---------------------------|--------------------------|--------------------------|--------------------------|--------------------------|
| <b>CHI/HA film</b>     | <b>475.89</b><br>± 78.70   | <b>292.21</b><br>± 46.31  | <b>247.66</b><br>± 45.80 | <b>244.24</b><br>± 13.57  | <b>238.60</b><br>± 35.01 | <b>226.71</b><br>± 23.90 | <b>221.71</b><br>± 26.96 | <b>234.34</b><br>± 80.31 |
| <b>CHI/ALG film</b>    | <b>702.26</b><br>± 42.92   | <b>274.85</b><br>± 37.99  | <b>257.61</b><br>± 33.30 | <b>251.32</b><br>± 39.66  | <b>242.70</b><br>± 15.13 | <b>284.02</b><br>± 59.28 | <b>279.34</b><br>± 15.80 | <b>264.90</b><br>± 15.61 |
| <b>CHI/TA film</b>     | <b>1042.78</b><br>± 179.54 | <b>854.35</b><br>± 153.16 | <b>684.90</b><br>± 97.87 | <b>659.86</b><br>± 205.16 | <b>594.92</b><br>± 92.29 | <b>508.64</b><br>± 53.29 | <b>517.91</b><br>± 91.40 | <b>478.63</b><br>± 82.43 |
